# Supplementary material for: Improved Electrical Signal of Non-Poled 3D Printed Zinc Oxide-Polyvinylidene Fluoride Nanocomposites
Source: MDPI journal article supplement (doi:10.3390/polym14204312), 2022-10-13
Supplement: s1 [file s1]

# Supplementary Materials: Improved Electrical Signal of Non-Poled 3D Printed Zinc Oxide-Polyvinylidene Fluoride Nanocomposites

Sharmad Joshi <sup>1</sup>, Enrique Gazmin <sup>2</sup>, Jayden Glover <sup>2</sup>, Nathan Weeks <sup>2</sup>, Fazeel Khan <sup>1</sup>, Scott Iacono <sup>2</sup>  and Giancarlo Corti <sup>1,\*</sup> 

## Supporting Information

**Table S1.** ZnO concentration measurements by weight

| Sample  | ave    | stdev  | error |
|---------|--------|--------|-------|
| PVDF    | 0      | 0      | 0.    |
| 2.5ZnO  | 3.093  | 0.113  | 0.06  |
| 5ZnO    | 4.683  | 0.213  | 0.12  |
| 7.5ZnO  | 6.853  | 0.277  | 0.16  |
| 10ZnO   | 9.193  | 1.137  | 0.65  |
| 12.5ZnO | 11.856 | 0.8452 | 0.48  |
| 15ZnO   | 14.666 | 0.786  | 0.45  |
| 20ZnO   | 20.103 | 0.436  | 0.25  |

avg=average,

stdev=standard deviation

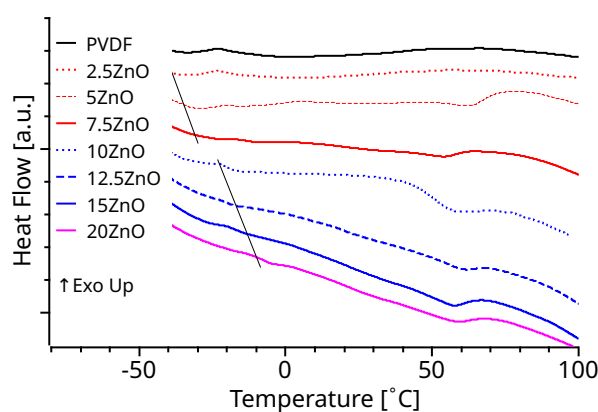

**Figure S1.** Glass transition temperature as function percentage of ZnO content.

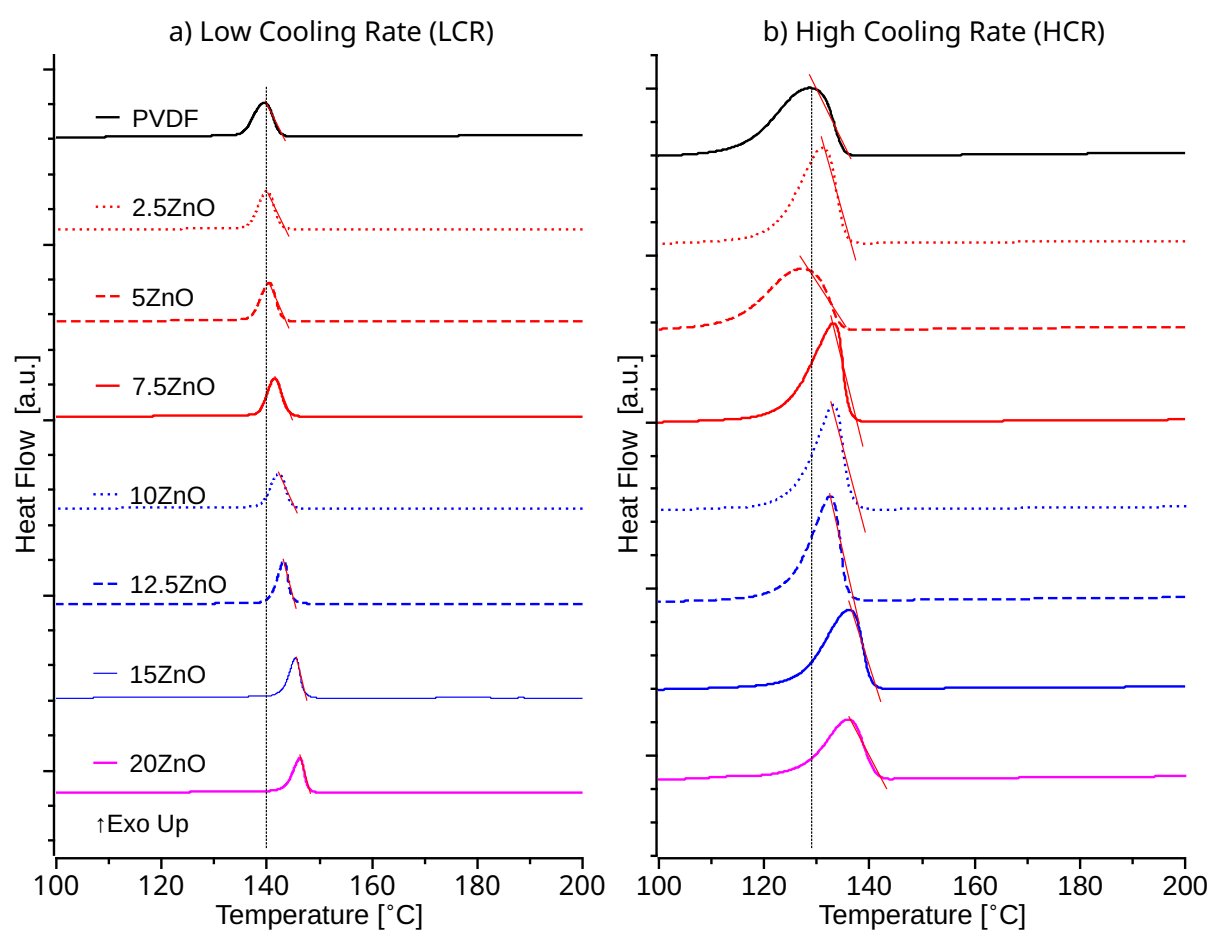

**Figure S2.** DSC crystallization for a cooling rate of a) 5°C min<sup>-1</sup> LCR, and b) 30°C min<sup>-1</sup> HCR.

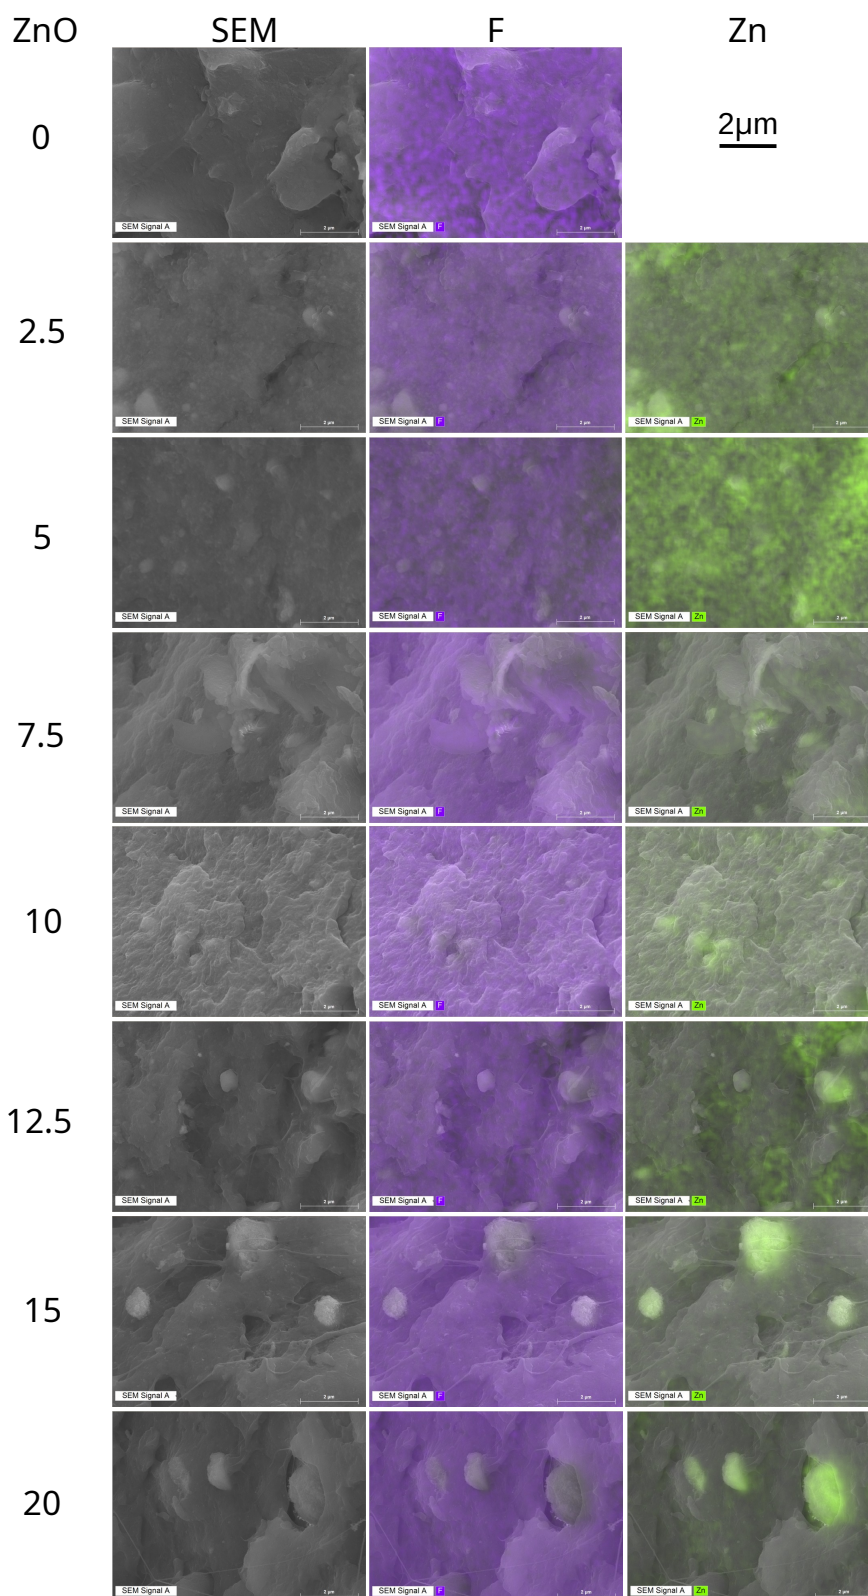

**Figure S3.** XEDS analysis at the failure of 3D printed specimens [45°,135°] tested under tensile stress.

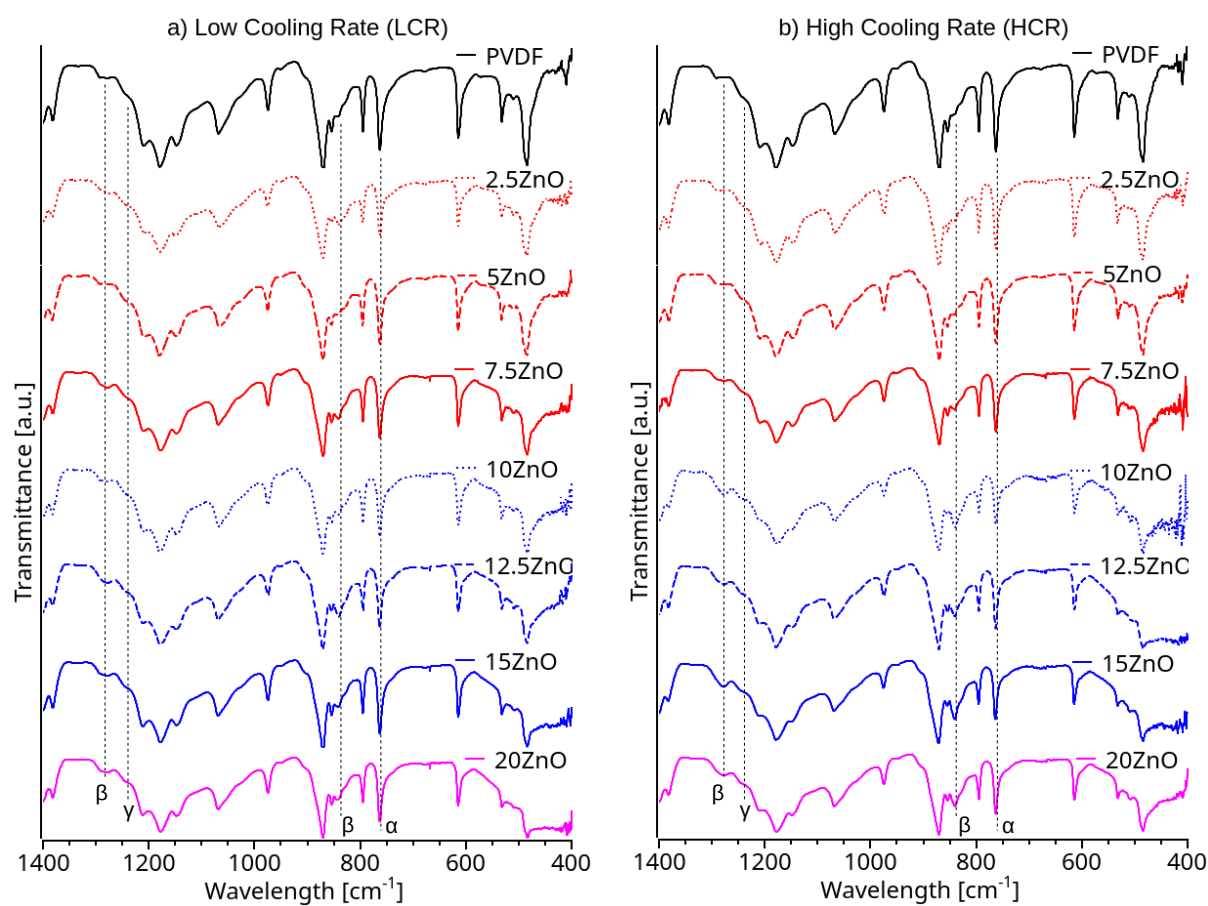

**Figure S4.** FTIR spectra of DSC samples after a cooling rate of: a) 5 °C min<sup>-1</sup> LCR, and b) 30 °C min<sup>-1</sup> HCR

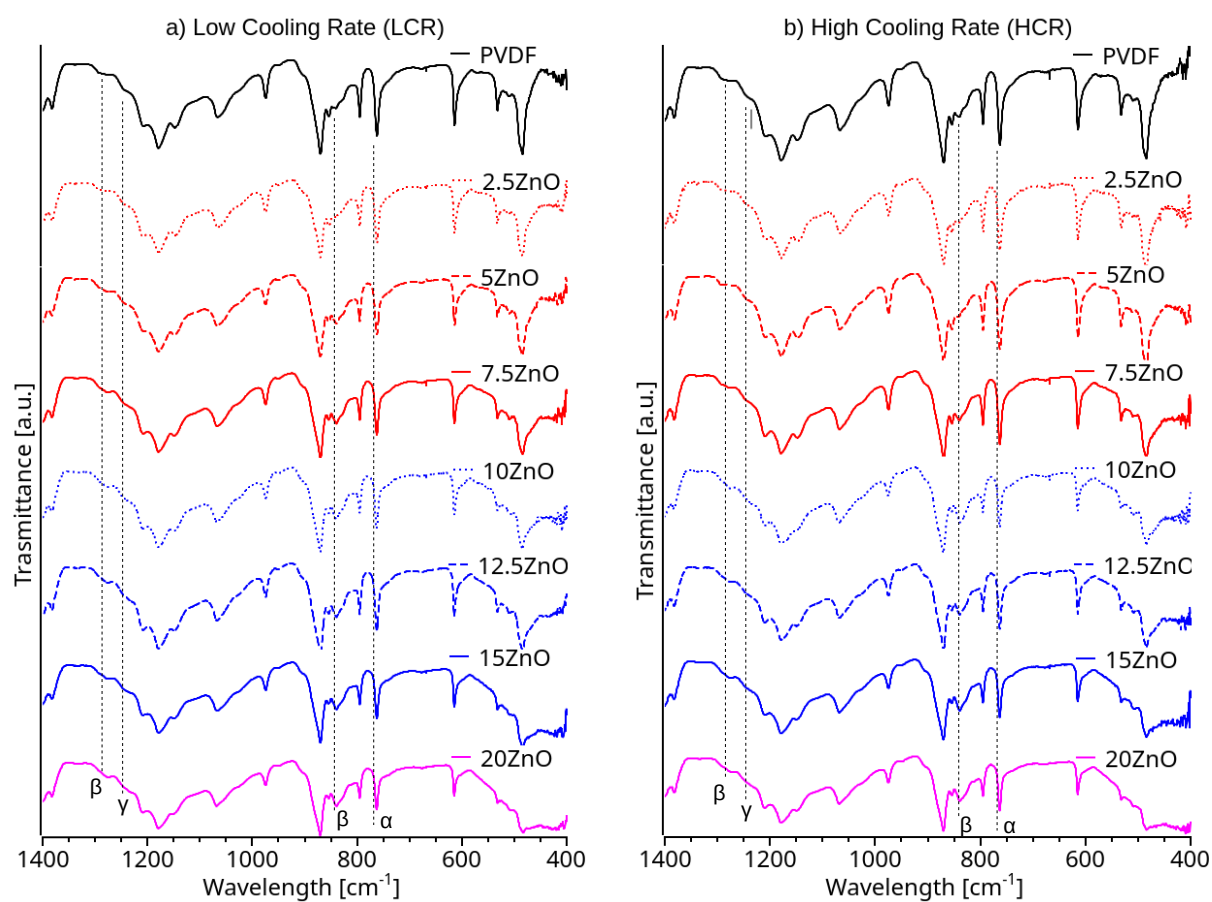

**Figure S5.** FTIR spectra from the top of a 3D printed DMA samples printed with a: a)  $5\text{ }^{\circ}\text{C min}^{-1}$  LCR, and b)  $30\text{ }^{\circ}\text{C min}^{-1}$  HCR.

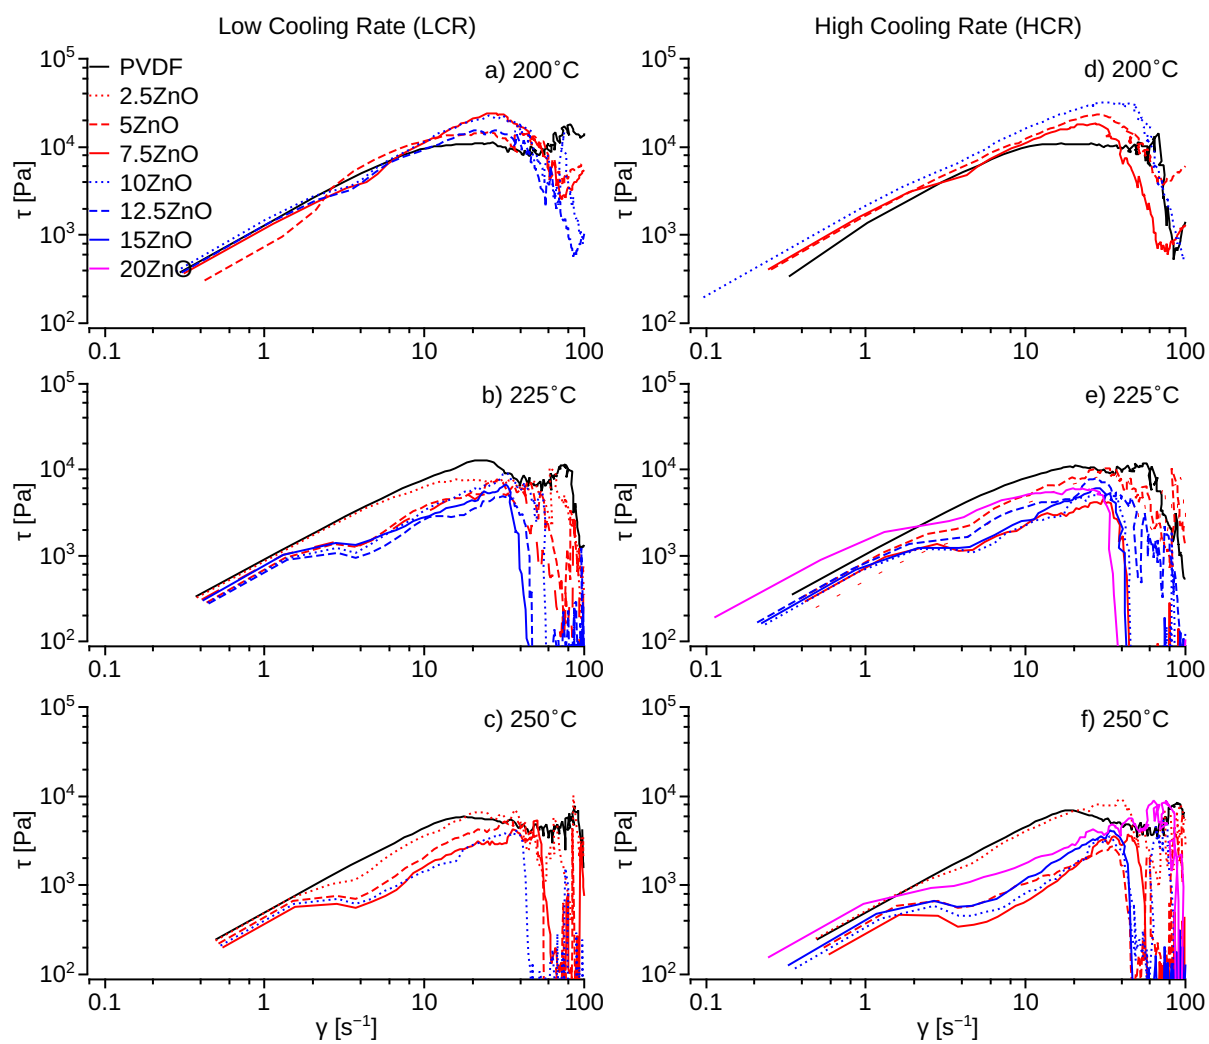

**Figure S6.** Shear stress  $\tau$  versus shear rate  $\gamma$  at different temperature profiles for low and high cooling rate 3D printed samples.

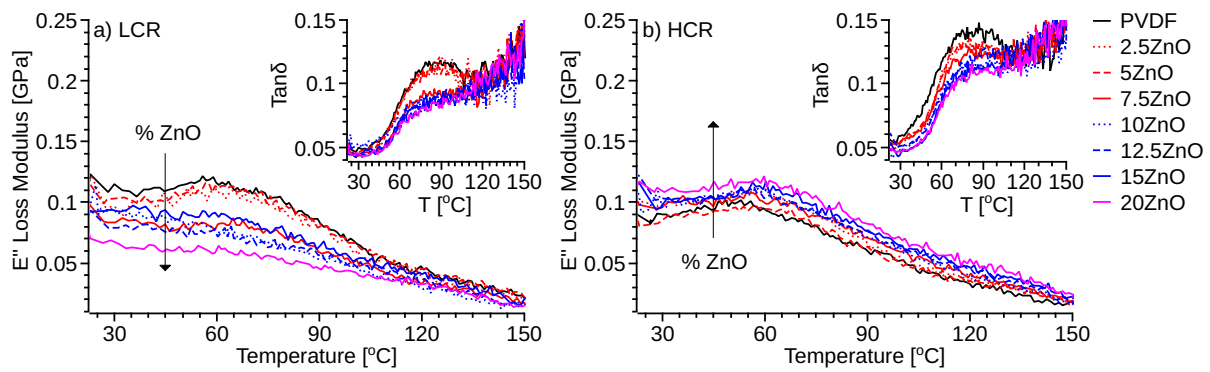

**Figure S7.** Loss modulus ( $E''$ ) of DMA specimens 3D printed with: a) low cooling rate (LCR), and b) high cooling rate (HCR).

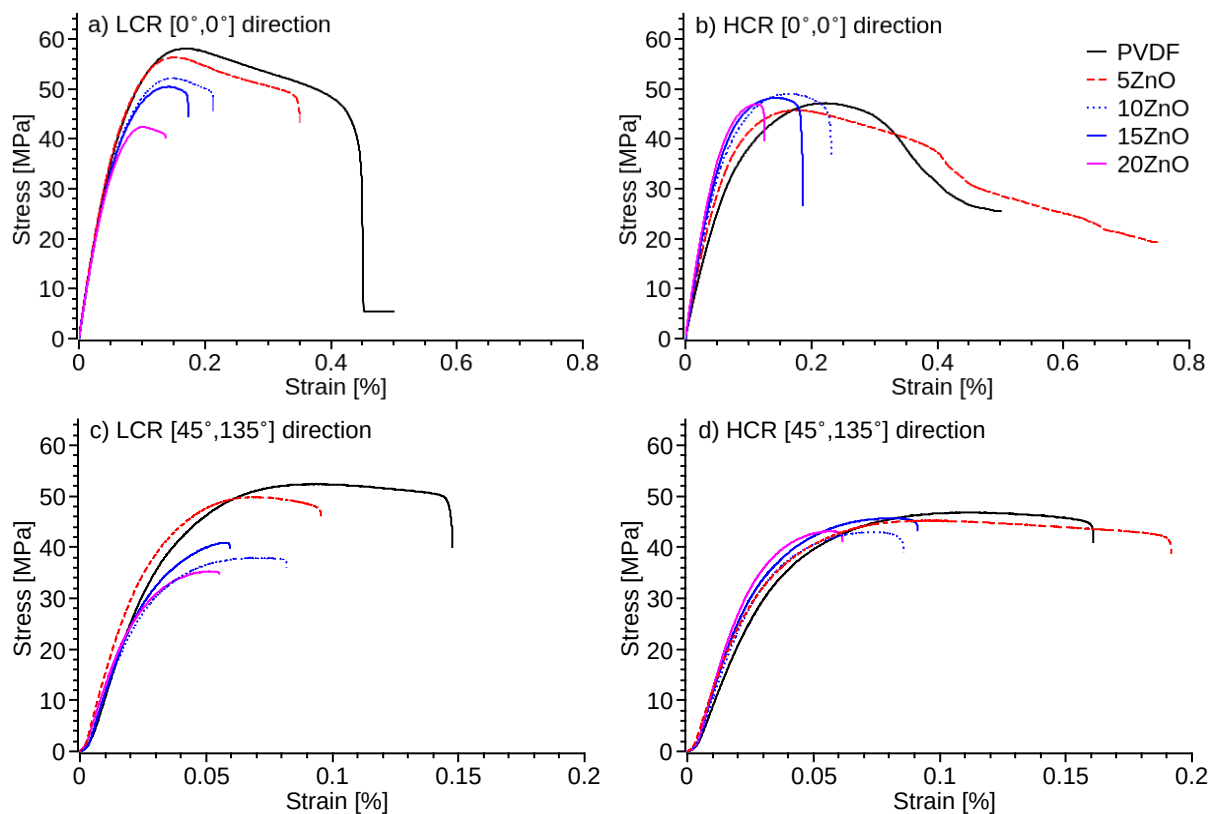

**Figure S8.** Sample stress vs. strain curves of tensile tests for 3D printed a) LCR with infill in the  $[0^{\circ}, 0^{\circ}]$  direction, HCR with infill in the  $[0^{\circ}, 0^{\circ}]$  direction, c) LCR with infill in the  $[45^{\circ}, 135^{\circ}]$  direction, and HCR with infill in the  $[45^{\circ}, 135^{\circ}]$  direction.

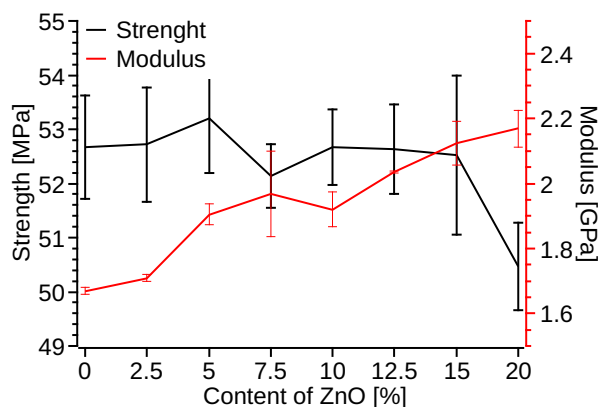

**Figure S9.** Strength (black) and elastic modulus (red) of the extruded filaments.

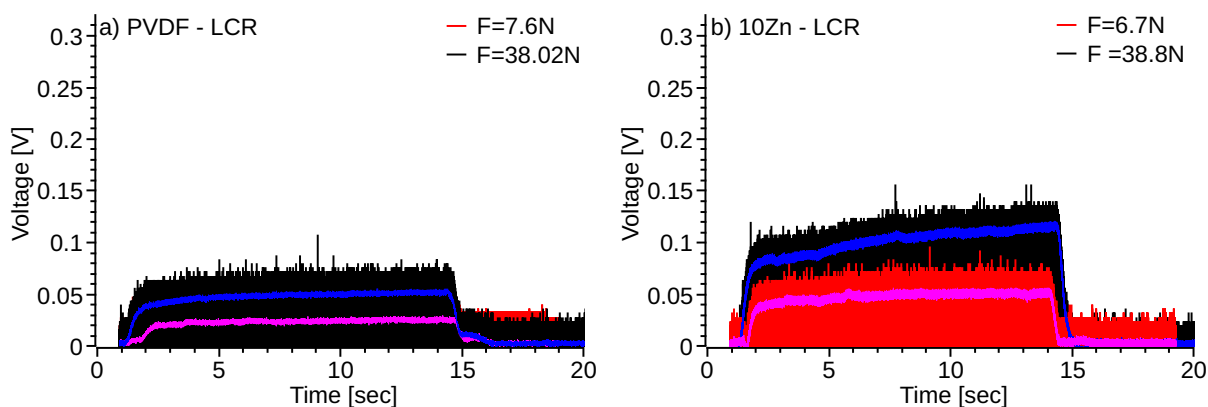

**Figure S10.** Voltage output in response to a 6Hz strain ( $\epsilon$ ) with an amplitude of  $0.0058 \text{ mm} \cdot \text{mm}^{-1}$  (red) and  $0.0274 \text{ mm} \cdot \text{mm}^{-1}$  (black) for LCR samples: a) pristine PVDF and b) PVDF with 10% ZnO. The blue and purple line represents a filtered voltage signal.

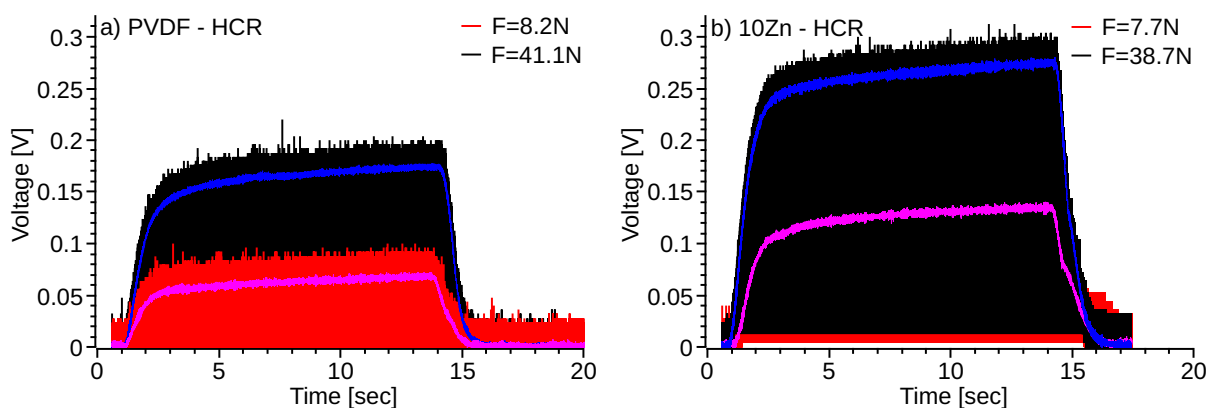

**Figure S11.** Voltage output in response to a 6Hz strain ( $\epsilon$ ) with an amplitude of  $0.0058 \text{ mm} \cdot \text{mm}^{-1}$  (red) and  $0.0274 \text{ mm} \cdot \text{mm}^{-1}$  (black) for HCR samples: a) pristine PVDF and b) PVDF with 10% ZnO. The blue and purple line represents a filtered voltage signal.



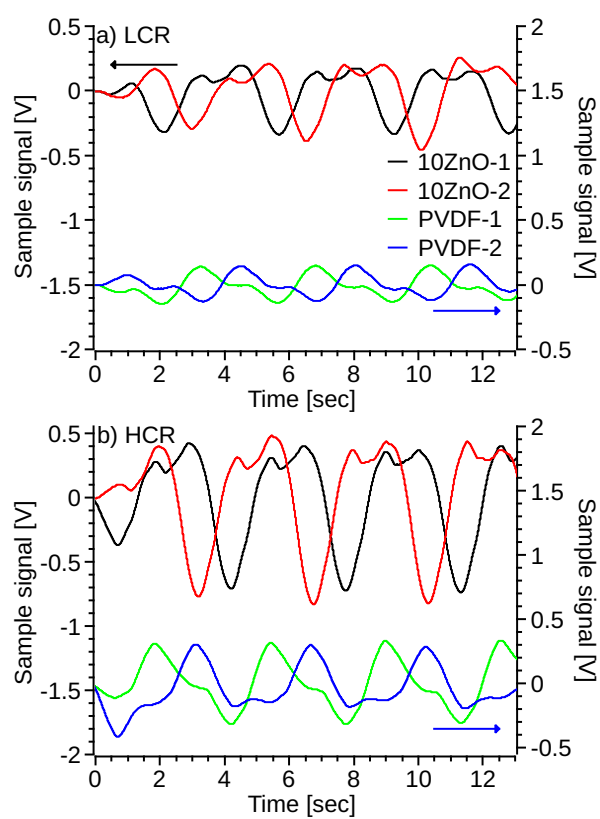

**Figure S12.** Voltage signal generated in response to a walking profile simulated on an MTS tensile frame by two different specimens of pristine PVDF and 10%ZnO PVDF nanocomposite.
